# Supplementary material
Source: MDPI journal article supplement (https://www.mdpi.com/1422-0067/23/17/10043)
Supplement: s1 [file s1]

Archive with 2 entries (2 files):
- ijms-1844313-supplementary.pdf
- Supplementary Table S4.xlsx
