# Supplementary material for: Precision Medicine: Determination of Ribavirin Urinary Metabolites in Relation to Drug Adverse Effects in HCV Patients
Source: MDPI journal article supplement (doi:10.3390/ijms231710043), 2022-09-02
Supplement: s1 [file s1 › Supplementary Table S4.xlsx]

## Sheet: Foglio1
µmol/mmol creatinine	Time	3-HIB	2,3-DH-2-MB	3-HMB	Gln	DMA	MG	Gly	Tyr	PSI	Hyp	1-MNA	TCONH2	TR-COOH	RBV
09TW4	TW4	18.2186	17.6252	12.2886	164.54	46.8245	19.0983	177.629	30.9095	93.9851	7.18794	6.74583	58.1881	40.8632	101.667
11TW4	TW4	13.6368	15.3424	10.385	129.922	42.3587	14.9254	183.851	14.9833	53.2363	12.904	3.36833	150.881	59.0575	140.048
12TW4	TW4	7.42457	17.2367	5.59064	92.2769	40.6961	10.414	80.3787	15.426	34.1817	10.7438	13.2819	49.7393	21.6676	57.4449
14TW4	TW4	13.4281	18.4047	7.18913	167.025	44.1476	14.3854	66.6938	16.5061	51.6476	9.84353	9.69959	89.683	14.3988	86.0322
16TW4	TW4	13.515	13.8392	7.62207	174.547	35.1574	17.2004	130.497	15.3774	52.8375	8.55067	2.04987	108.54	46.1527	127.129
19TW4	TW4	7.3064	17.5182	7.9479	73.9467	50.3137	11.6139	86.8666	14.8234	54.9248	6.48555	2.05497	76.3556	35.9999	76.0659
20TW4	TW4	7.49253	9.2235	4.0959	83.1501	27.2829	6.95211	100.458	8.72793	33.2136	3.96059	2.70342	71.2131	24.4865	75.4387
21TW4	TW4	7.17231	12.1833	5.92291	121.046	41.6241	49.0535	53.4124	6.77804	67.8846	8.00813	5.27131	89.9427	48.4995	75.919
27TW4	TW4	22.7411	19.2754	10.1844	168.351	33.5906	15.1531	183.325	19.9213	28.7633	5.43899	2.48683	92.2764	35.8862	100.831
40TW4	TW4	18.181	12.7275	5.05458	129.439	27.2145	10.5795	63.7476	21.3317	33.1459	12.6586	5.60866	153.798	16.6163	70.234
42TW4	TW4	19.3026	20.7712	8.6358	96.5671	37.3225	4.45392	198.817	25.4104	41.9047	12.6016	1.61471	199.988	48.3682	111.336
43TW4	TW4	10.6112	7.34691	8.09615	116.2	42.2677	9.59674	95.7135	20.388	40.811	7.16158	4.52017	138.614	14.4829	55.8129
44TW4	TW4	14.3389	16.5255	8.40927	105.02	29.1341	41.0282	115.03	9.39571	39.3652	6.14706	7.56049	132.444	14.6576	59.3637
45TW4	TW4	6.6036	7.9152	7.42589	33.9437	26.1209	9.38693	66.3624	16.1373	33.6073	4.93681	5.7344	98.9354	28.6518	73.6606
47TW4	TW4	6.65114	10.8772	5.67352	51.2749	28.8117	25.336	67.1963	11.8051	31.9996	4.43207	4.75834	51.1714	21.3455	79.3454
48TW4	TW4	8.22287	16.0265	5.62888	129.948	34.6702	15.2267	96.4526	20.1218	39.2403	10.4263	3.64658	50.9728	29.1193	70.7396
50TW4	TW4	7.49134	7.67797	9.88763	86.0973	26.2797	7.67057	173.052	19.4119	26.942	8.35574	2.11206	152.282	19.9053	62.9754
09EOT	EOT	14.3388	14.4204	7.46028	117.926	42.0051	16.6428	147.654	21.8359	77.5427	11.7507	6.86351	33.2695	14.3732	73.7961
11EOT	EOT	14.194	12.8383	5.60649	113.008	49.7328	16.8483	128.748	11.0479	52.8018	10.2376	5.17962	81.0808	20.2139	114.572
12EOT	EOT	5.73036	11.2577	3.16707	96.0291	37.0577	9.99649	66.9196	12.6026	33.6236	9.71202	7.54907	41.4709	16.6907	55.928
14EOT	EOT	10.981	9.32631	8.08699	215.741	41.7326	14.8175	103.846	8.80726	47.6542	4.61758	8.13932	38.0625	5.81629	29.2024
16EOT	EOT	8.64664	13.1271	4.37169	135.156	40.1433	14.1439	70.7397	9.56281	55.8463	12.9276	5.05038	80.9886	58.9215	139.129
19EOT	EOT	9.23871	20.7969	10.3496	126.393	51.3404	11.928	105.714	21.5138	36.3176	5.29973	7.30614	88.3501	39.8224	70.9869
20EOT	EOT	10.5938	10.4054	5.1216	112.686	44.4966	8.11975	143.637	10.6715	29.1406	8.85173	1.78149	57.6899	18.8193	71.426
21EOT	EOT	14.3687	15.2637	10.0906	107.669	33.0931	30.9222	120.178	10.6471	57.1278	3.71898	3.22233	22.4863	8.08058	51.2997
27EOT	EOT	10.6114	20.2819	6.02443	83.1393	114.962	11.1413	105.669	9.86094	28.0742	8.64043	6.28021	110.807	11.5887	63.2069
40EOT	EOT	15.8095	12.5932	6.22116	108.106	32.6926	11.9744	117.156	18.2964	32.9409	10.0062	7.15683	117.673	44.9308	98.5873
42EOT	EOT	8.89511	16.2474	12.4709	124.66	34.5794	11.9467	193.768	15.7624	35.968	8.52975	1.8743	138.467	35.8922	117.437
43EOT	EOT	8.27421	8.5866	5.23708	71.9287	109.232	11.9311	66.0169	23.0566	40.5106	10.1553	4.56884	97.1491	12.0381	37.0196
44EOT	EOT	8.17689	9.94544	4.11741	66.2147	24.8643	11.5355	83.633	8.22805	51.4349	7.46869	3.97996	31.0082	5.99199	49.3134
45EOT	EOT	9.6472	8.59217	13.3939	55.6133	33.5837	12.0201	74.5325	21.6355	84.1629	2.97393	5.28491	27.6589	9.75749	56.0637
47EOT	EOT	8.77672	9.22399	6.71604	93.6431	26.989	12.5979	69.8679	18.2552	31.0756	2.78484	1.70787	16.9944	5.016	41.3796
48EOT	EOT	13.1555	19.1409	6.66162	113.197	33.9446	26.0628	121.064	22.0996	39.2084	9.3247	3.46212	42.9054	19.5205	74.5561
50EOT	EOT	12.6942	6.28962	11.3185	135.436	30.0082	8.62615	137.58	27.846	33.5532	10.4666	1.91884	131.189	22.4866	82.6873
